# Supplementary material
Source: PubMed Central journal article supplement (PMC3433174)

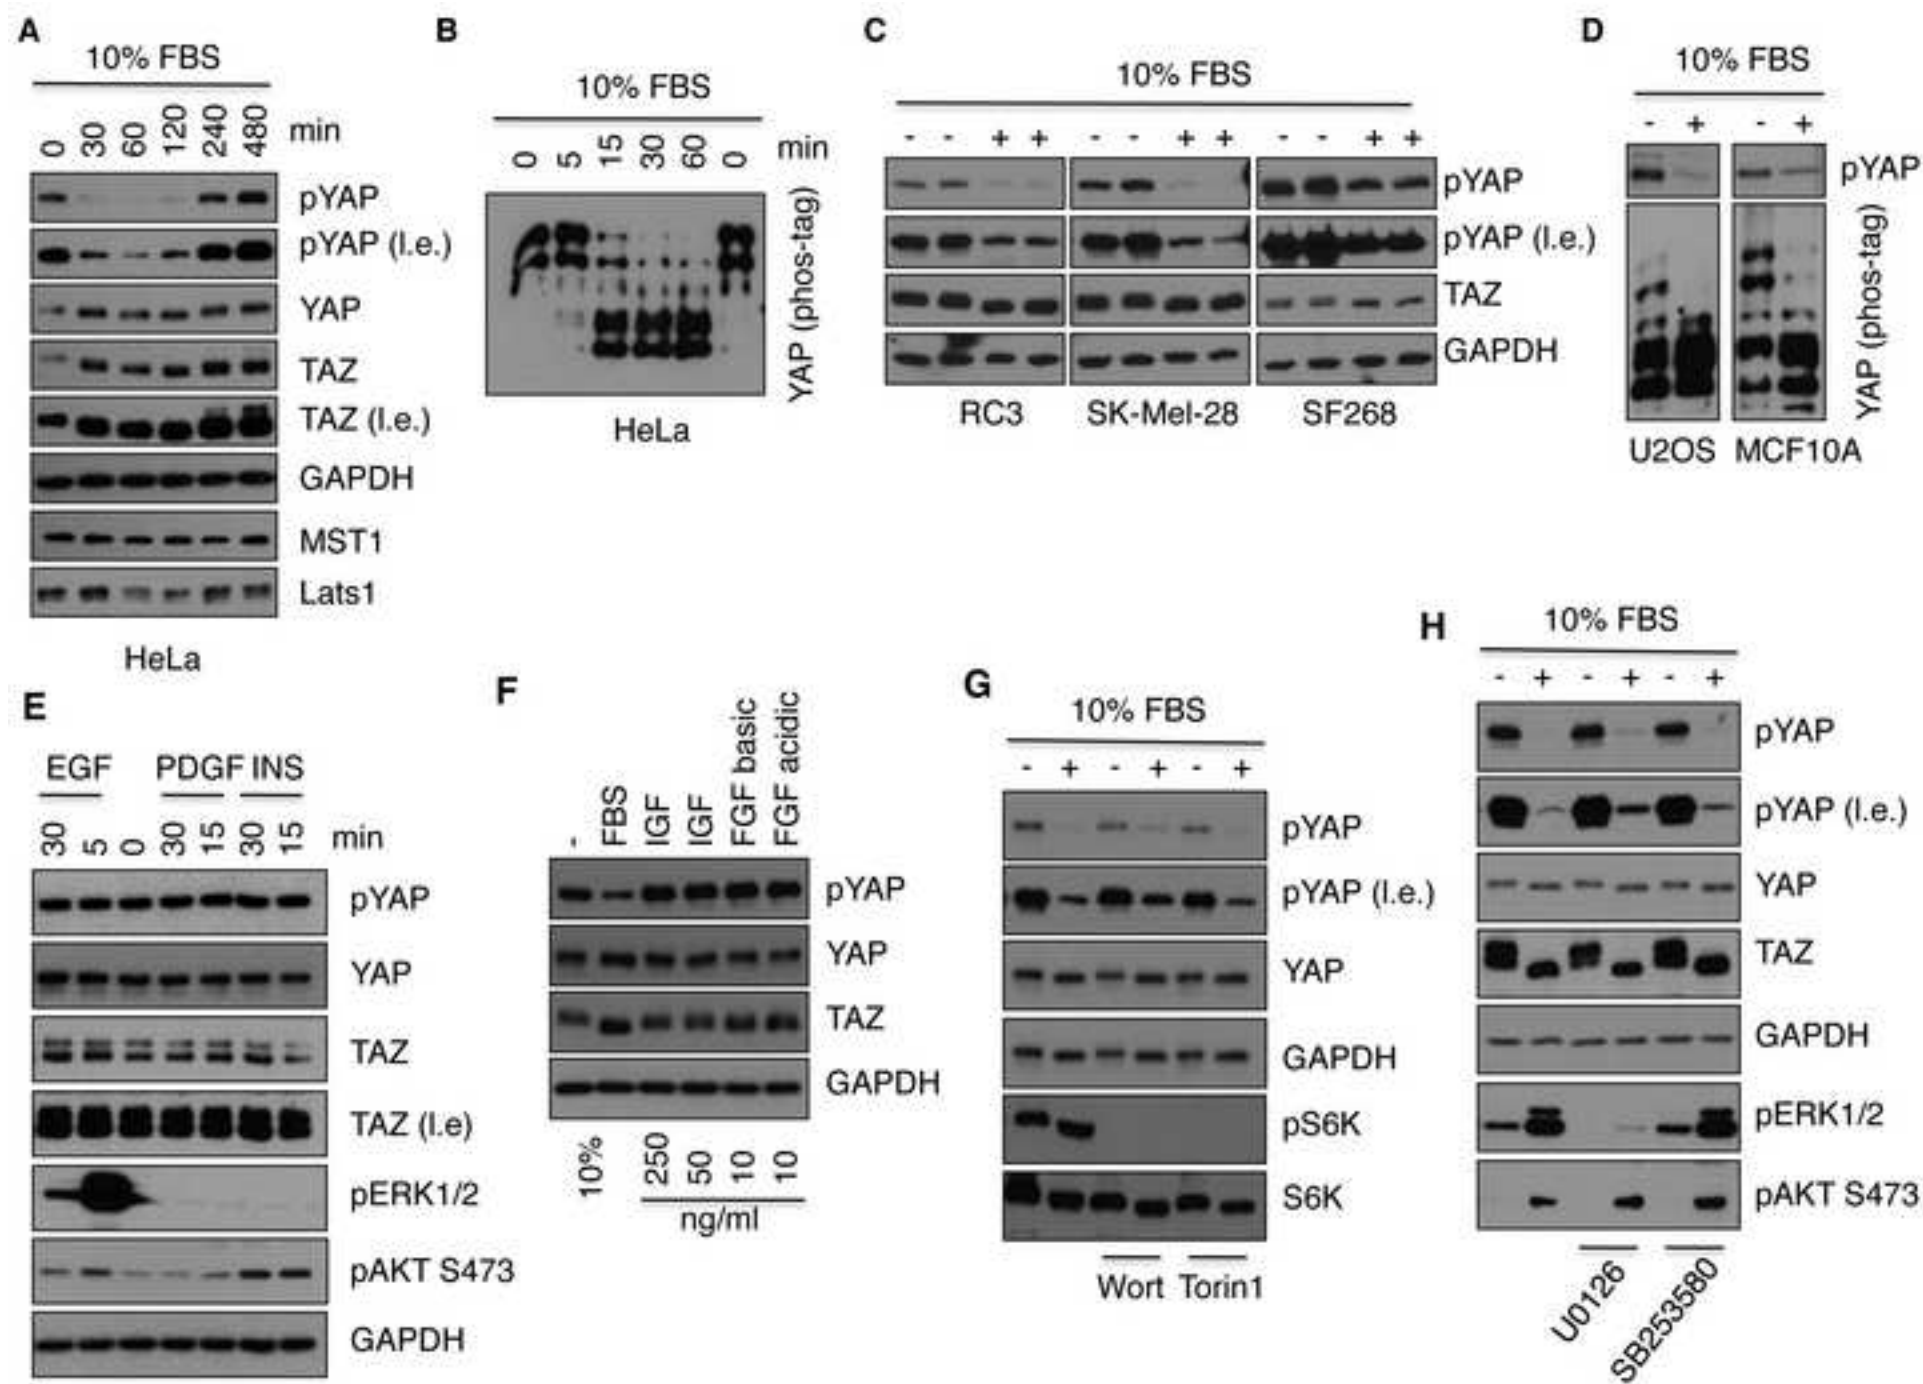

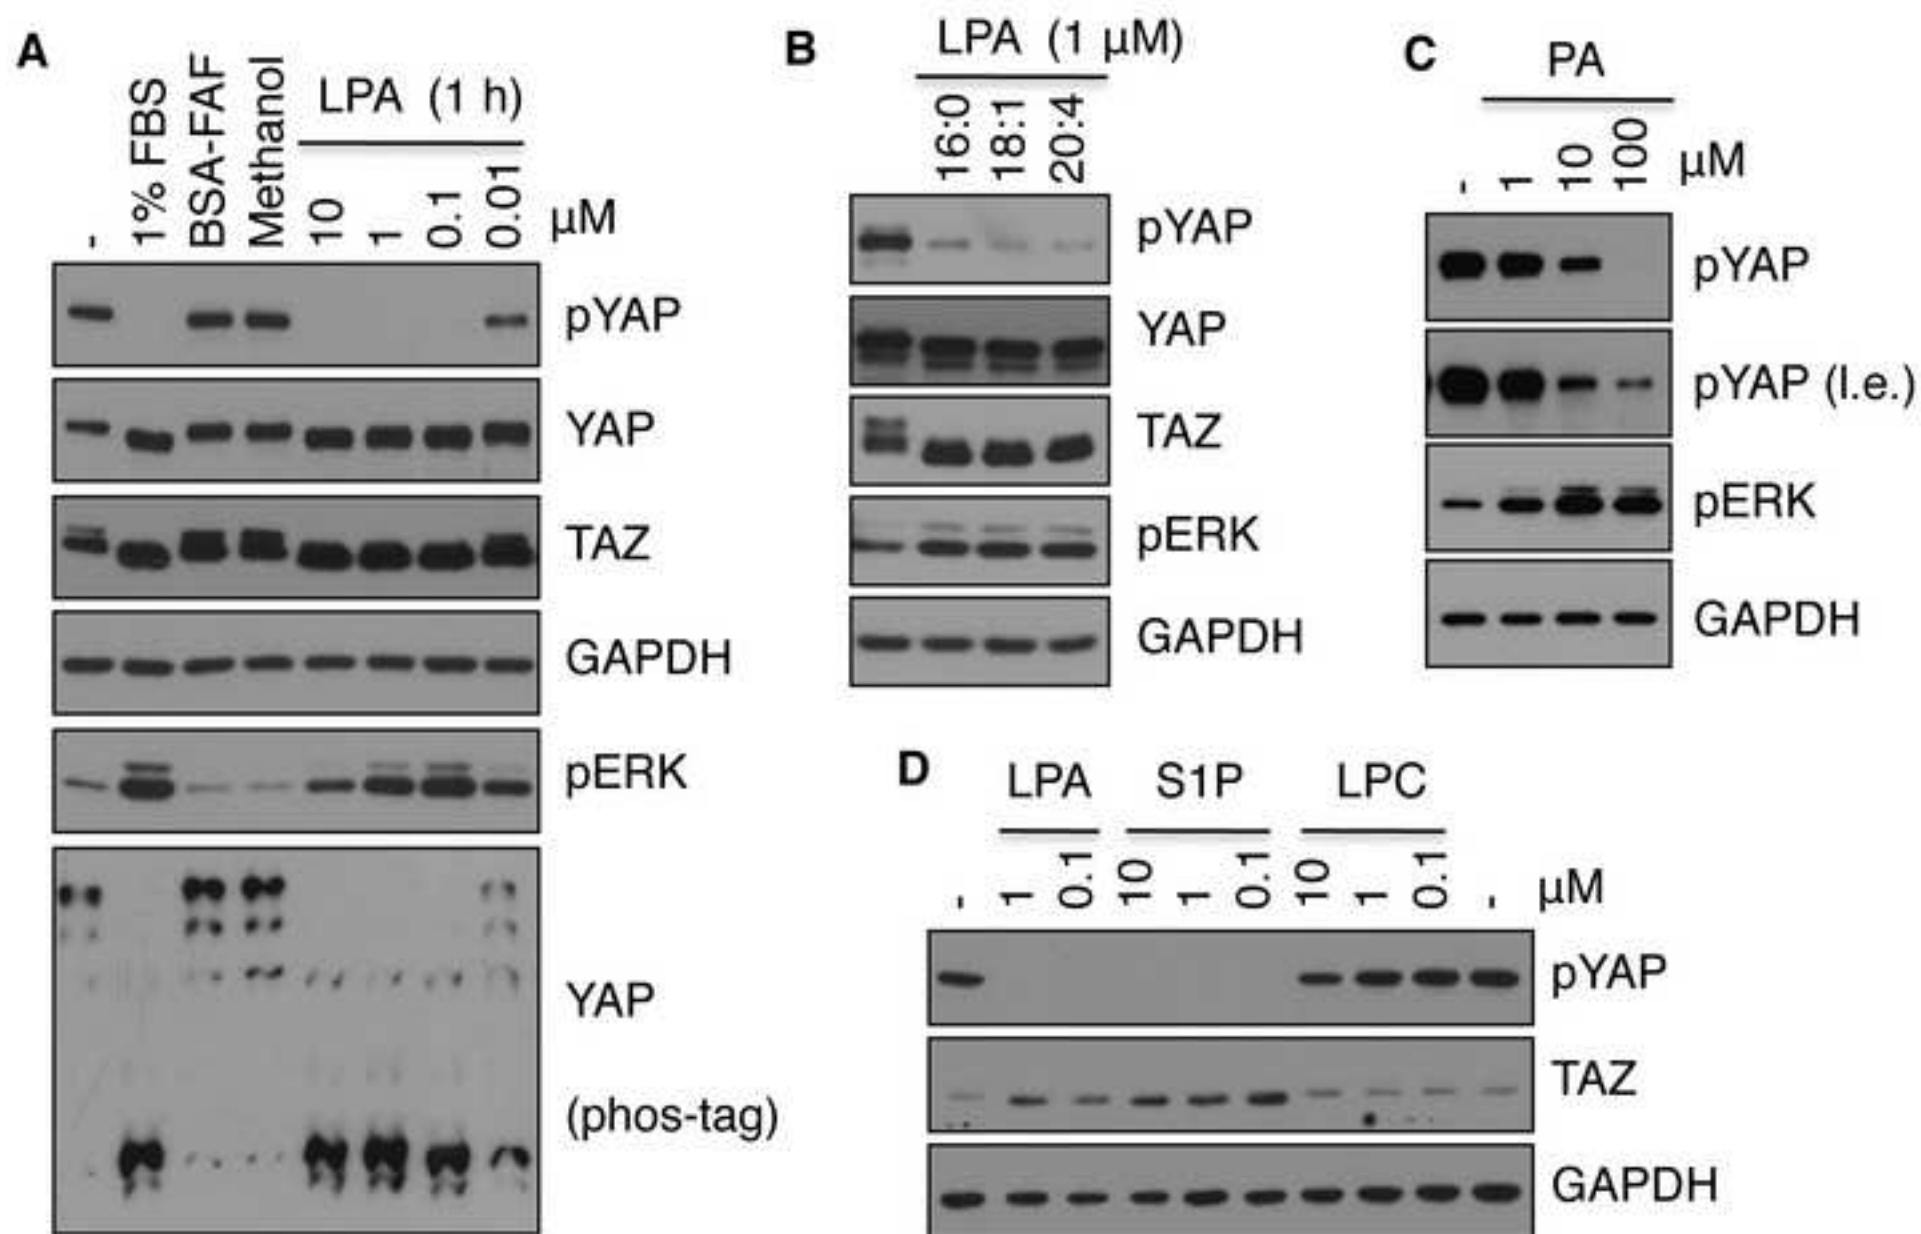

**A**

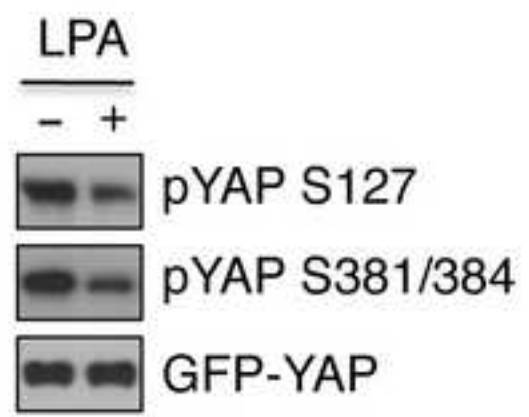

**B**

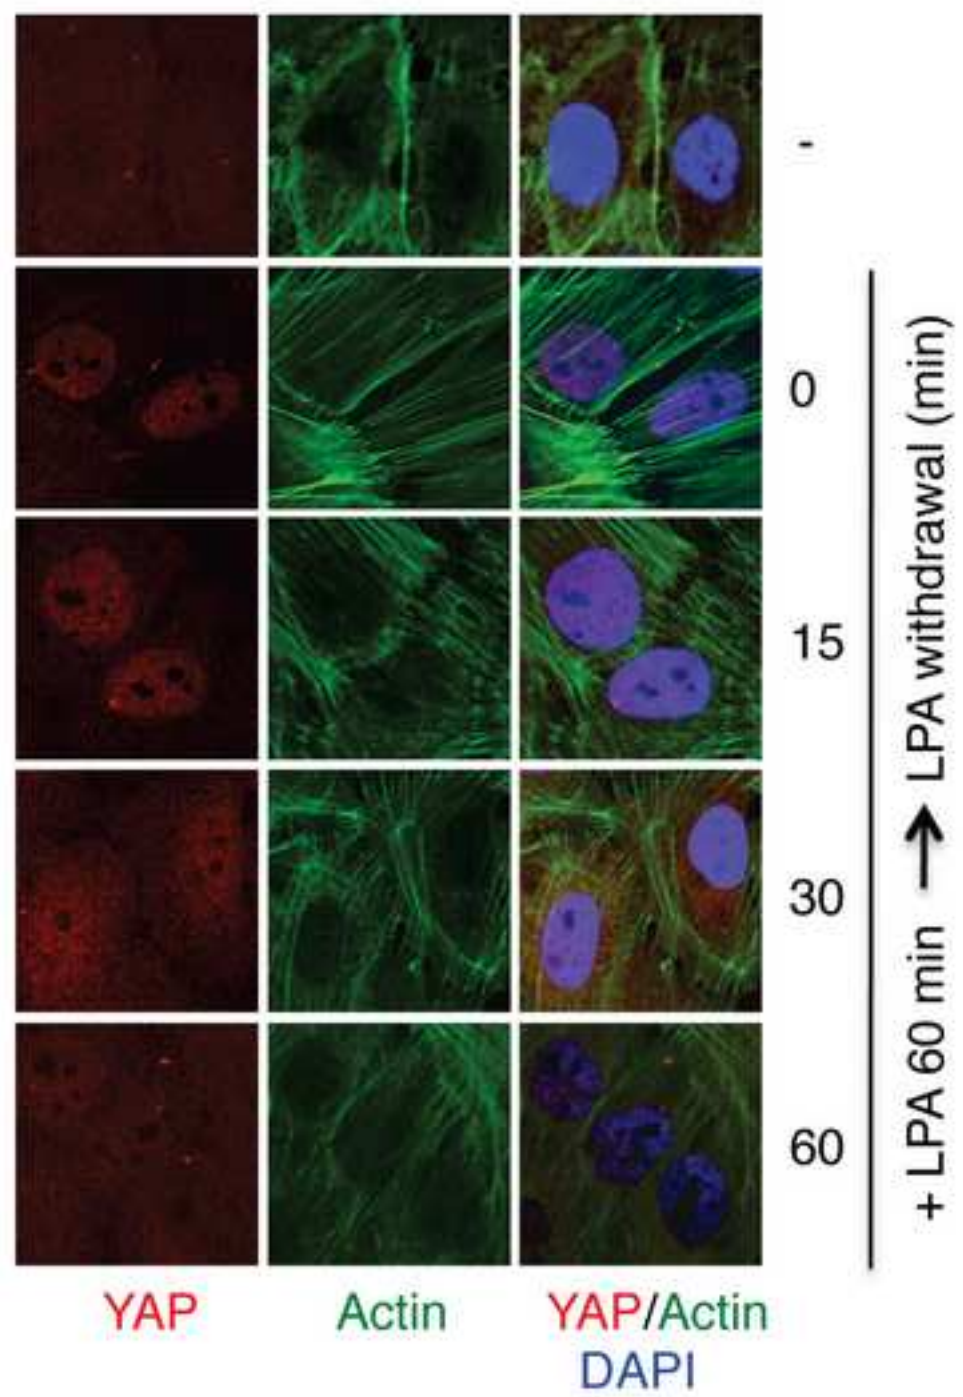

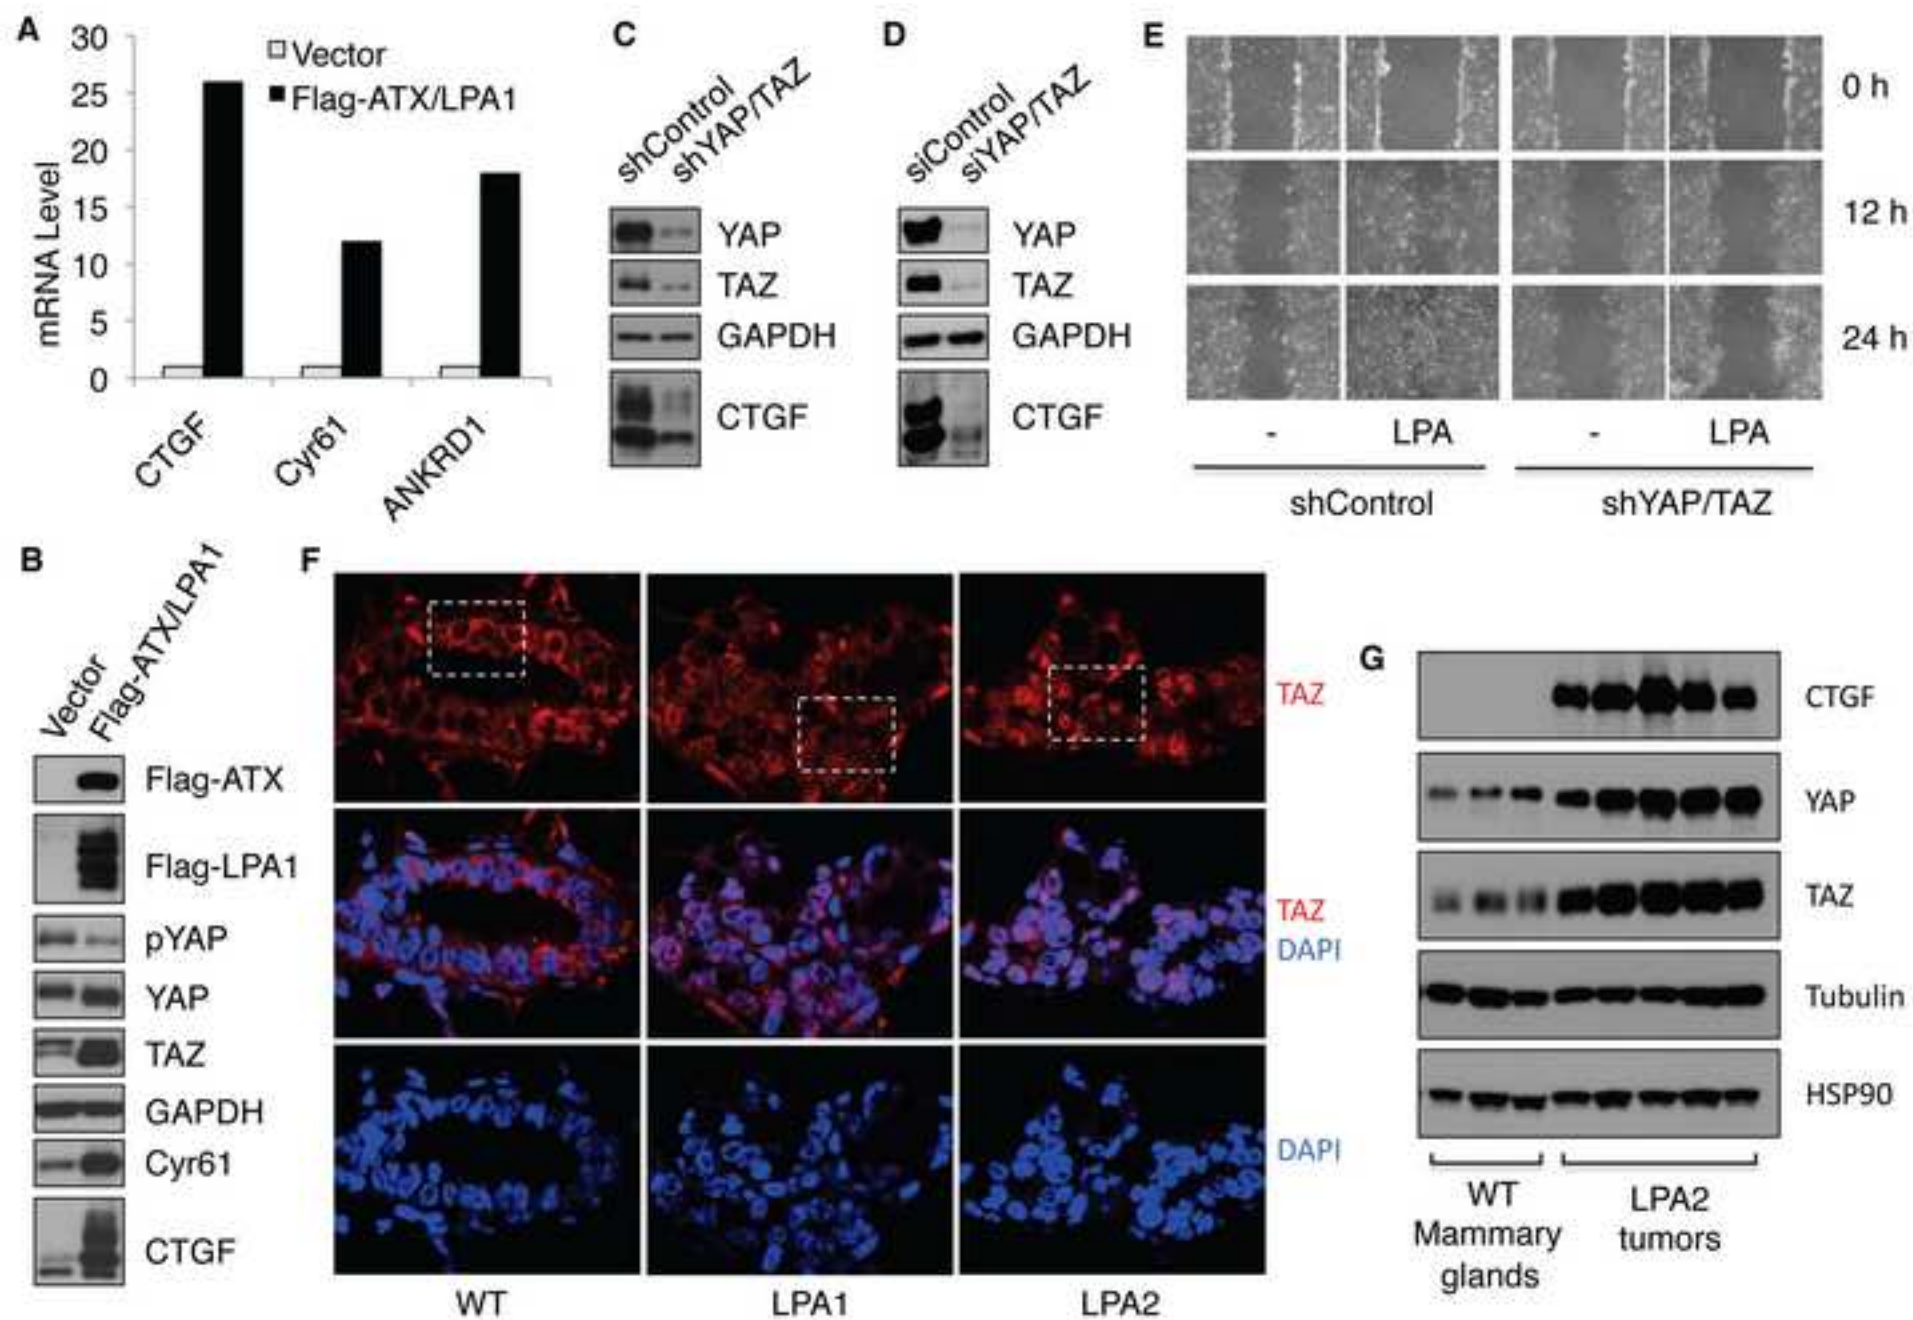

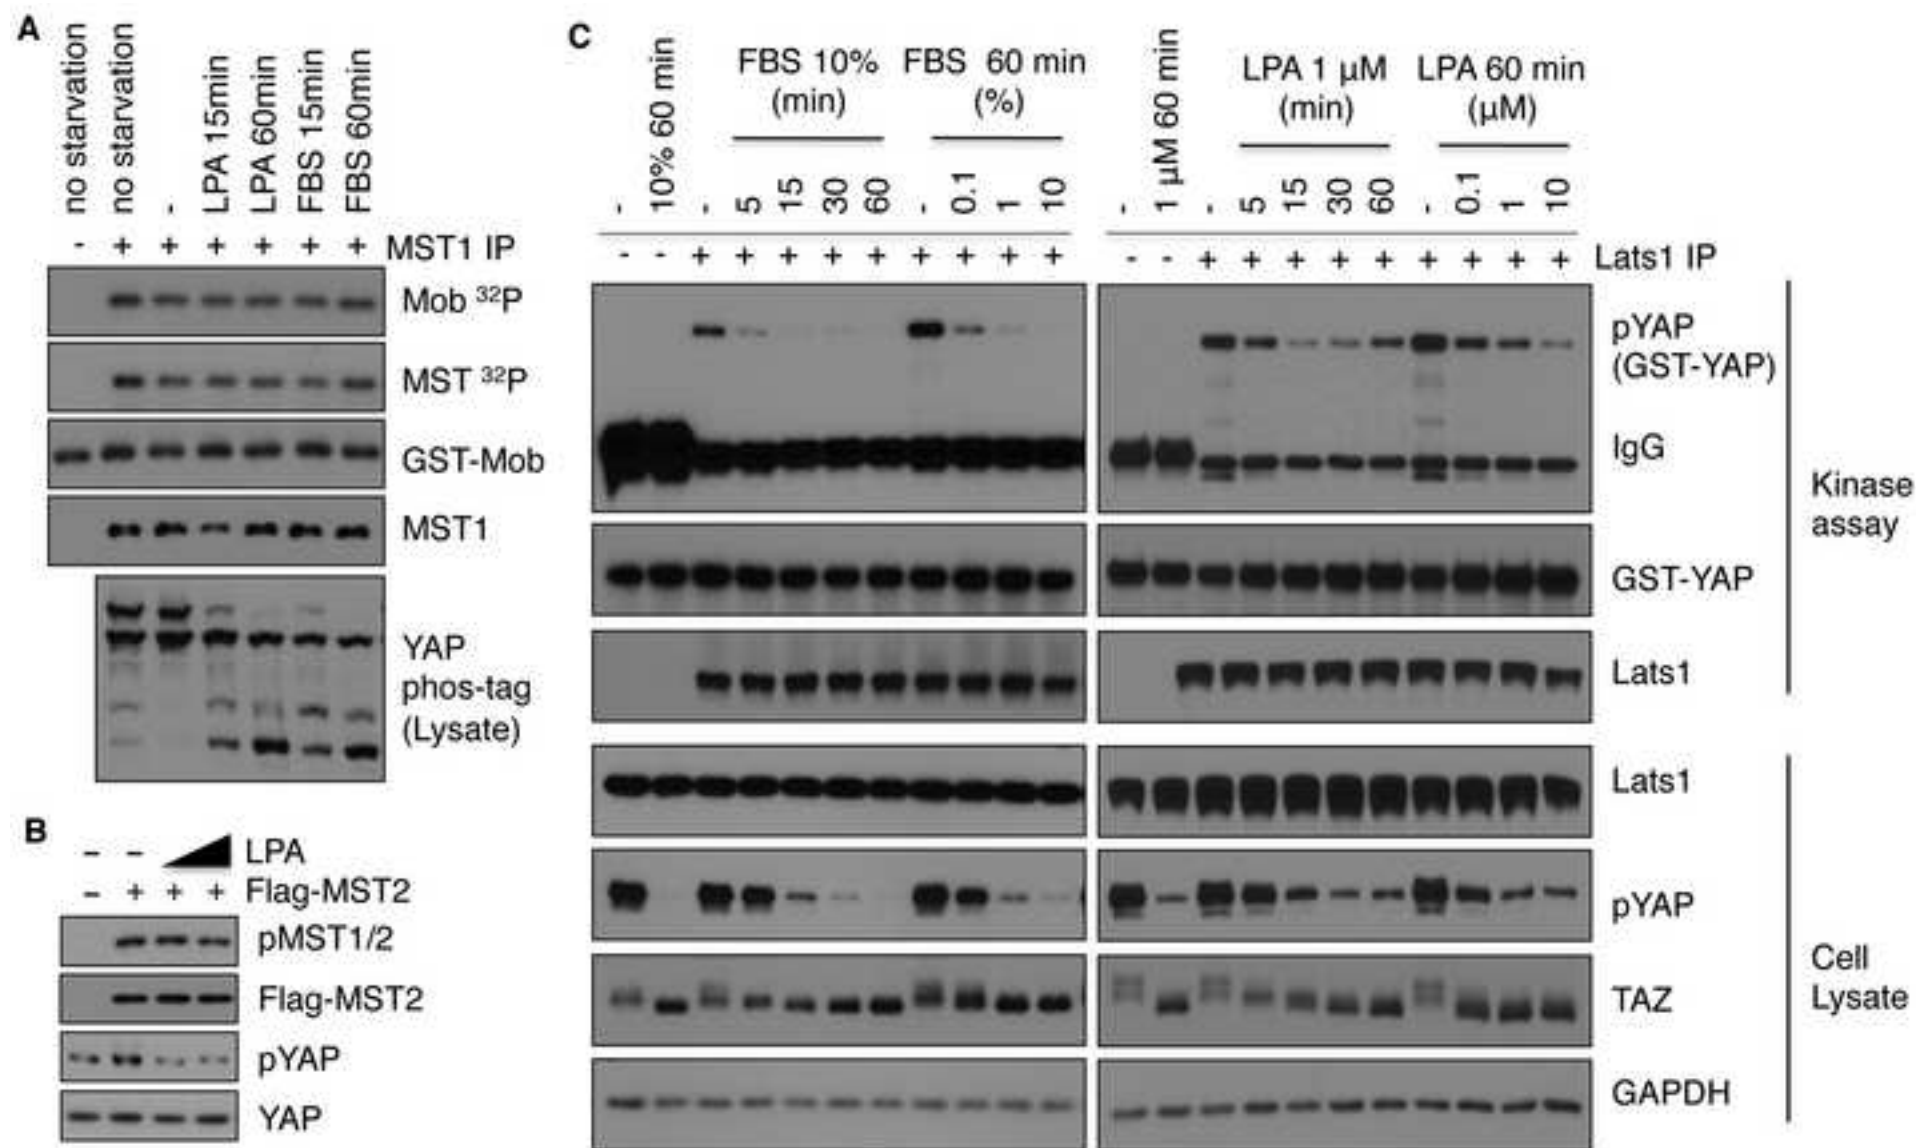

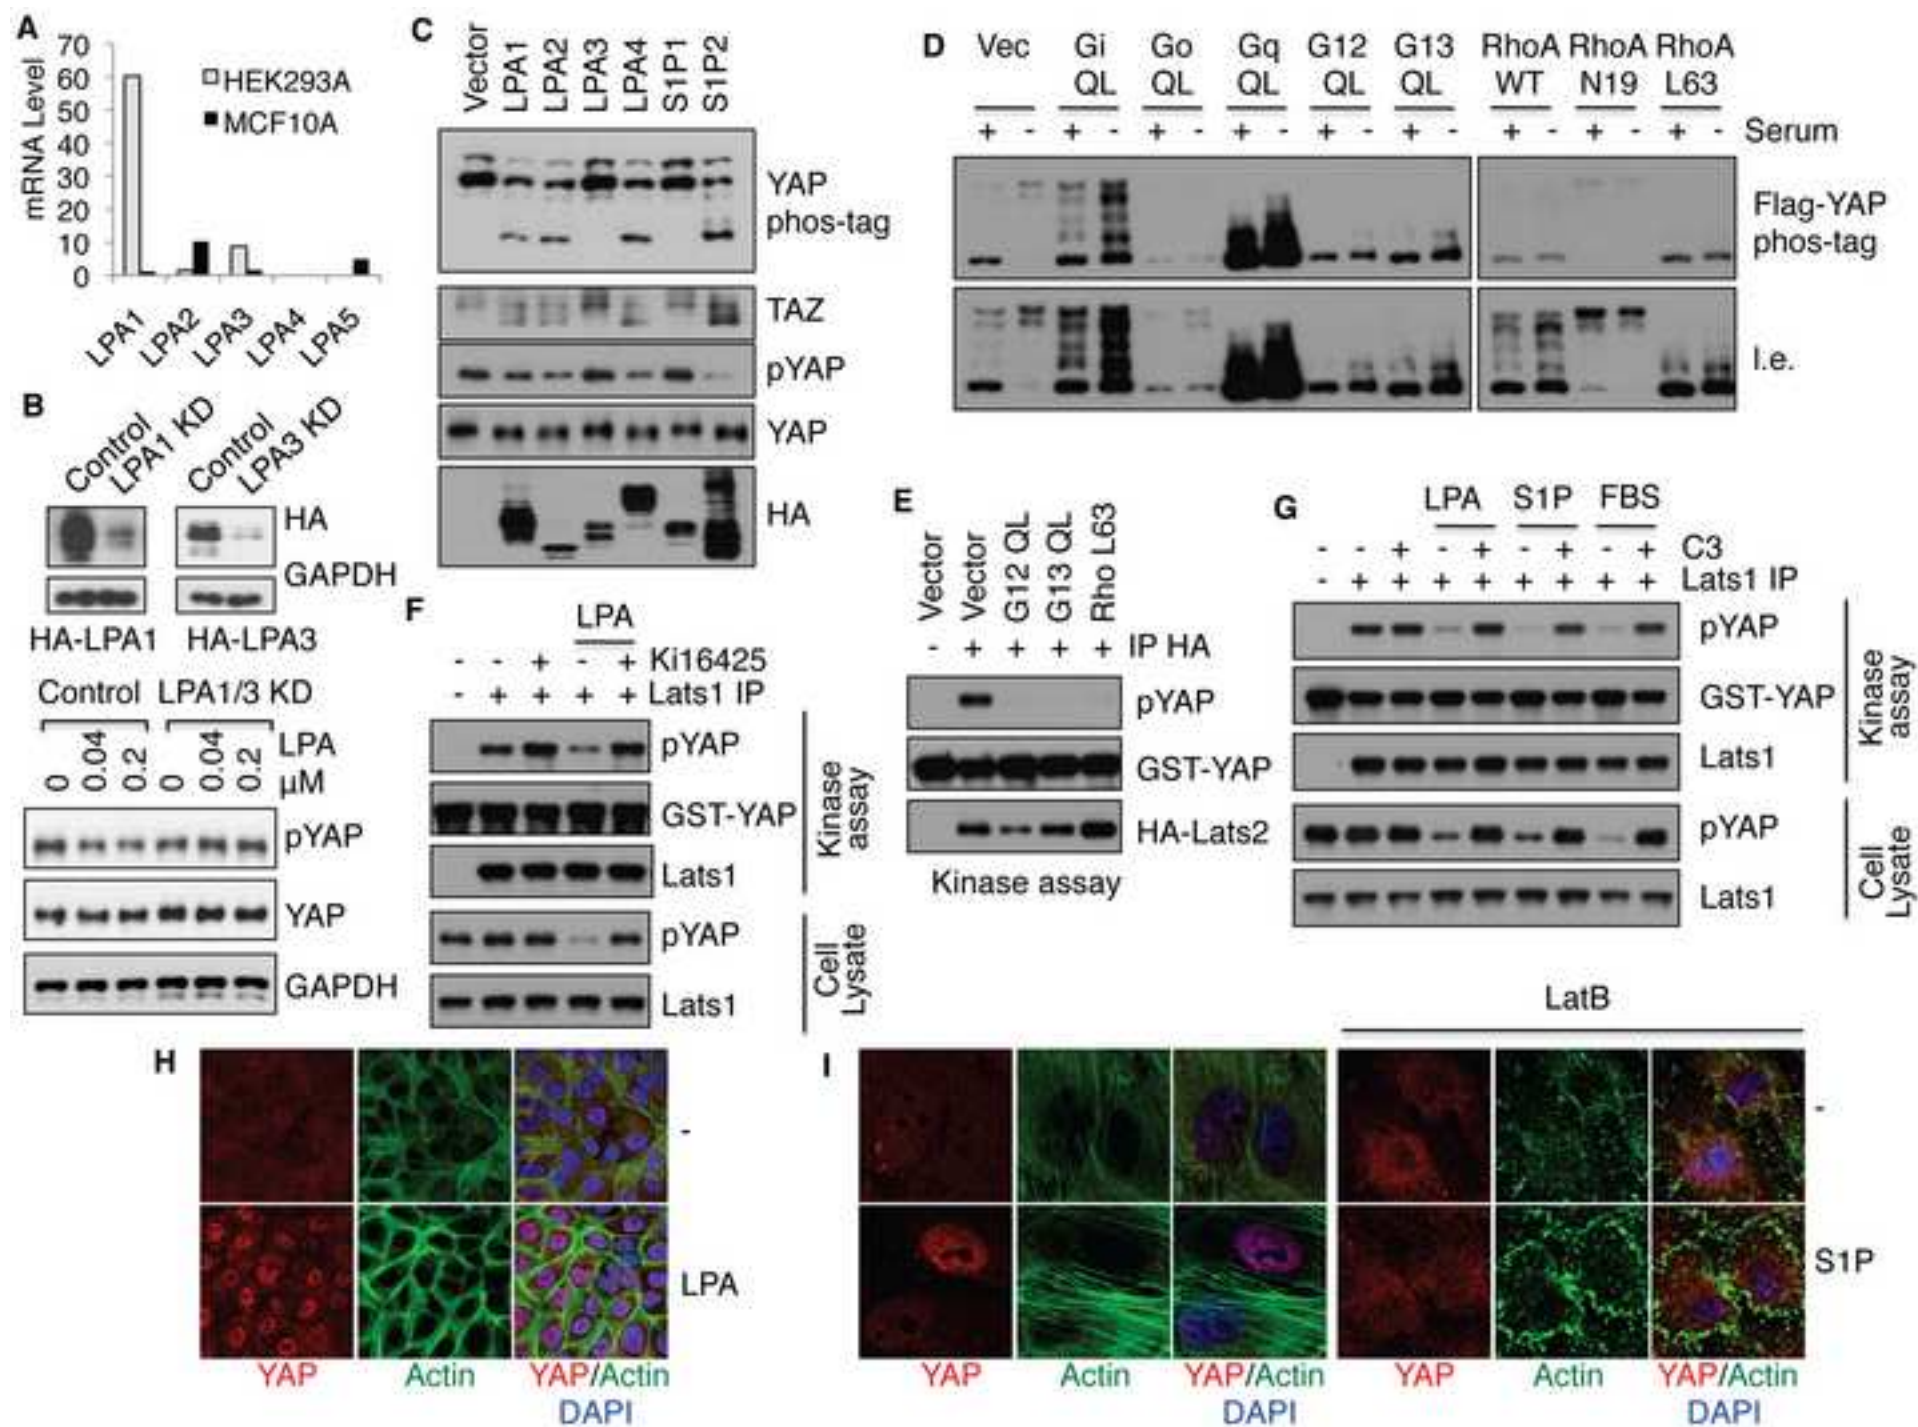

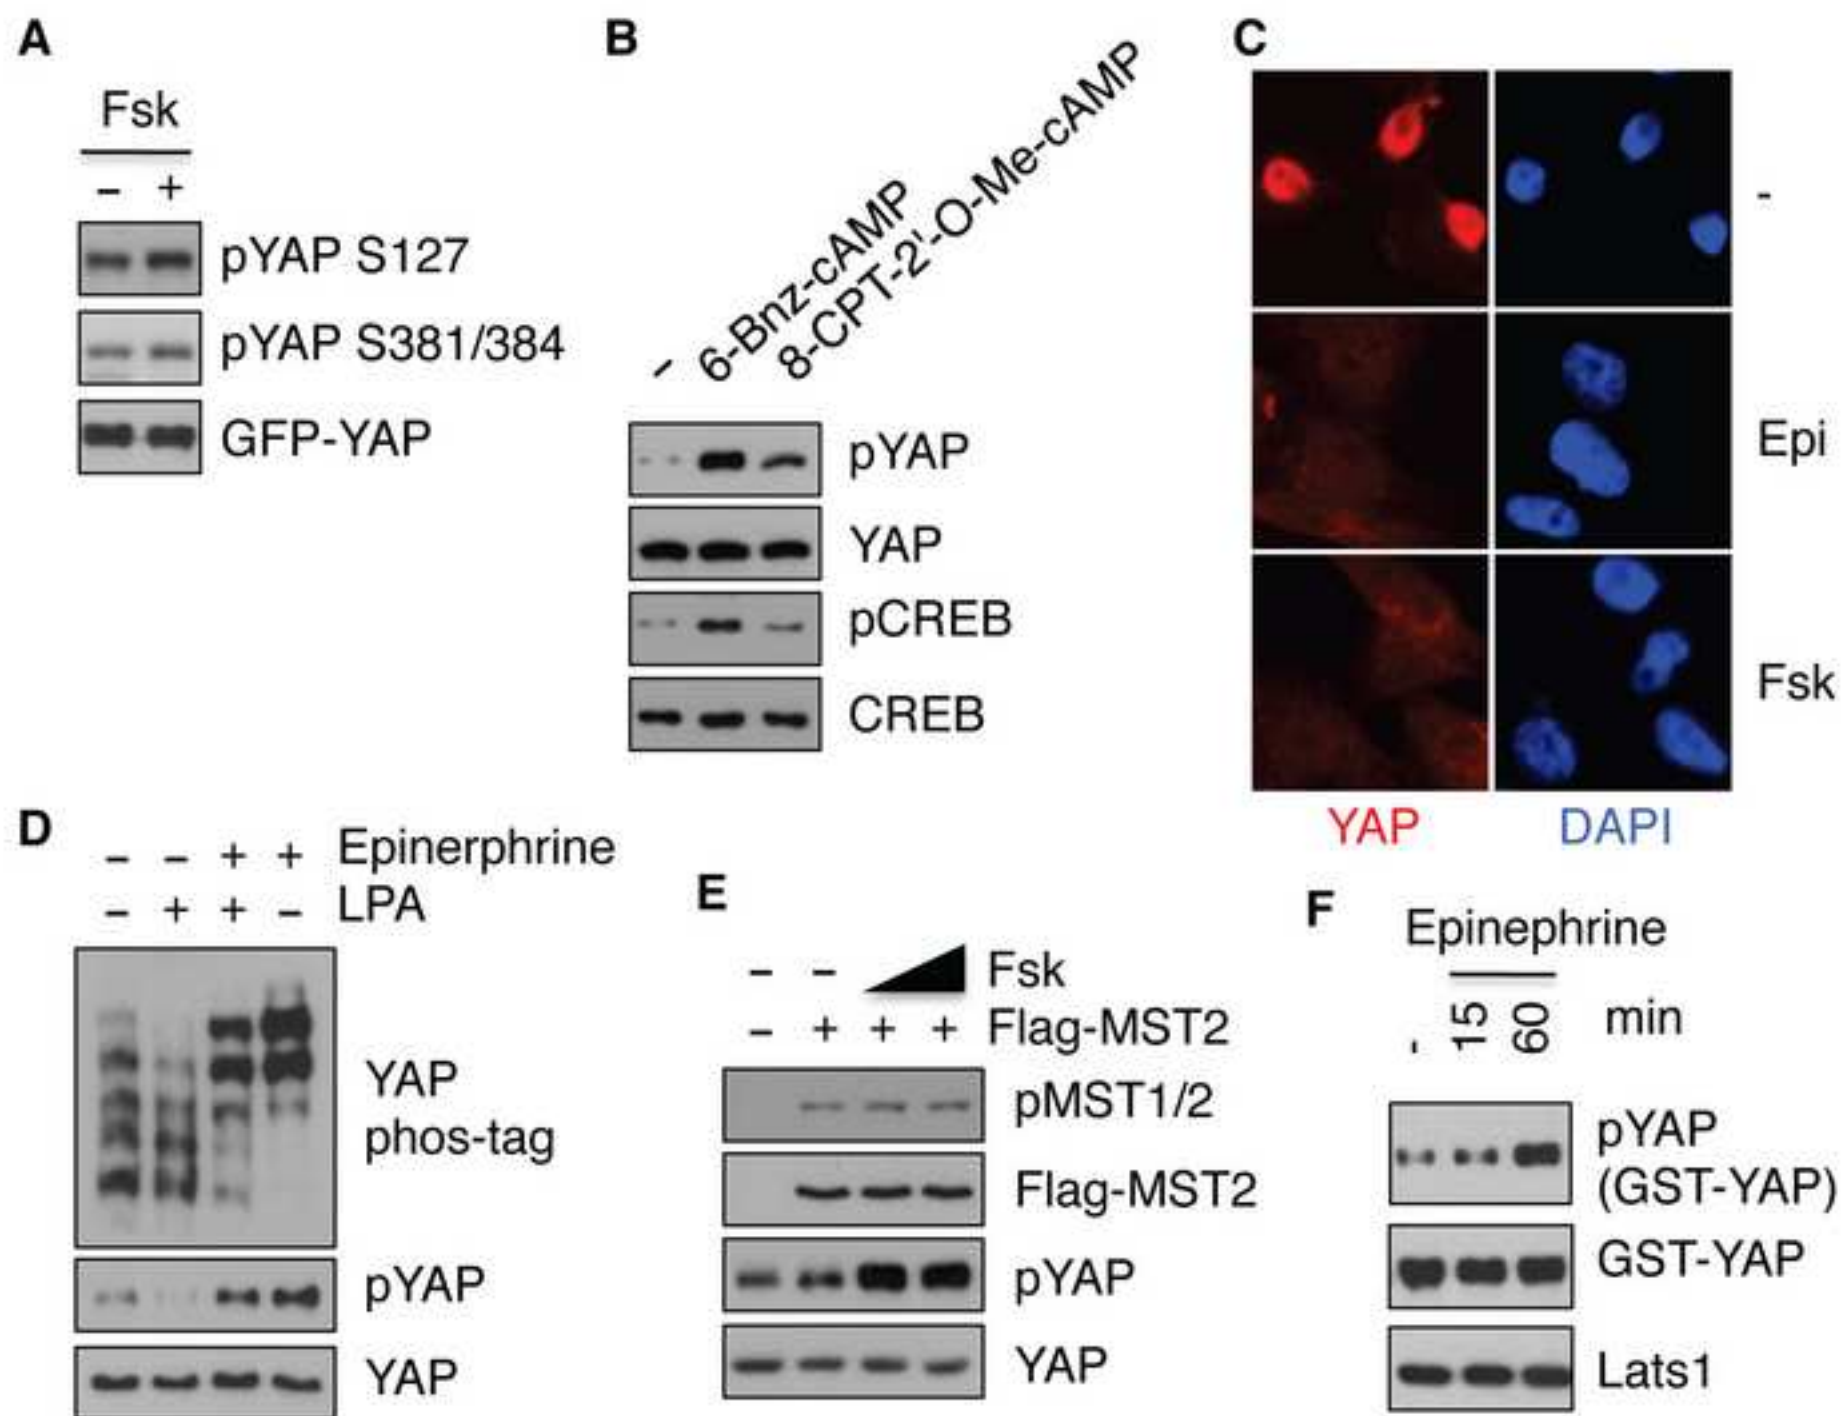

Supplement: NIHMS395799-supplement-02.pdf [file NIHMS395799-supplement-02.pdf]
